# Supplementary material
Source: PubMed Central journal article supplement (PMC7053168)
Supplement: NIHMS1514358-supplement-2.pdf [file NIHMS1514358-supplement-2.pdf]

## Supplemental Results

**Supplementary Movie 1.** Approximately 1/3 of rNLS8 mice that were injected with ASOxMMP9 displayed a jumpy, hyperactive set of behaviors consistent with seizure activity between 2 and 3 weeks off DOX. Age- and DOX treatment- matched rNLS8 mice injected with ASO-cntrl had a typical disease course compared to rNLS8 mice without any ASO treatment. Finally, nTg mice treated with ASOxMMP9 appeared normal and had no motor defects or seizure-like behaviors, suggesting that it is an interaction between MMP-9 reduction and TDP-43-triggered disease processes that negative effects rNLS8 mice, rather than ASO-treatment itself.

### Supplementary Figure 1

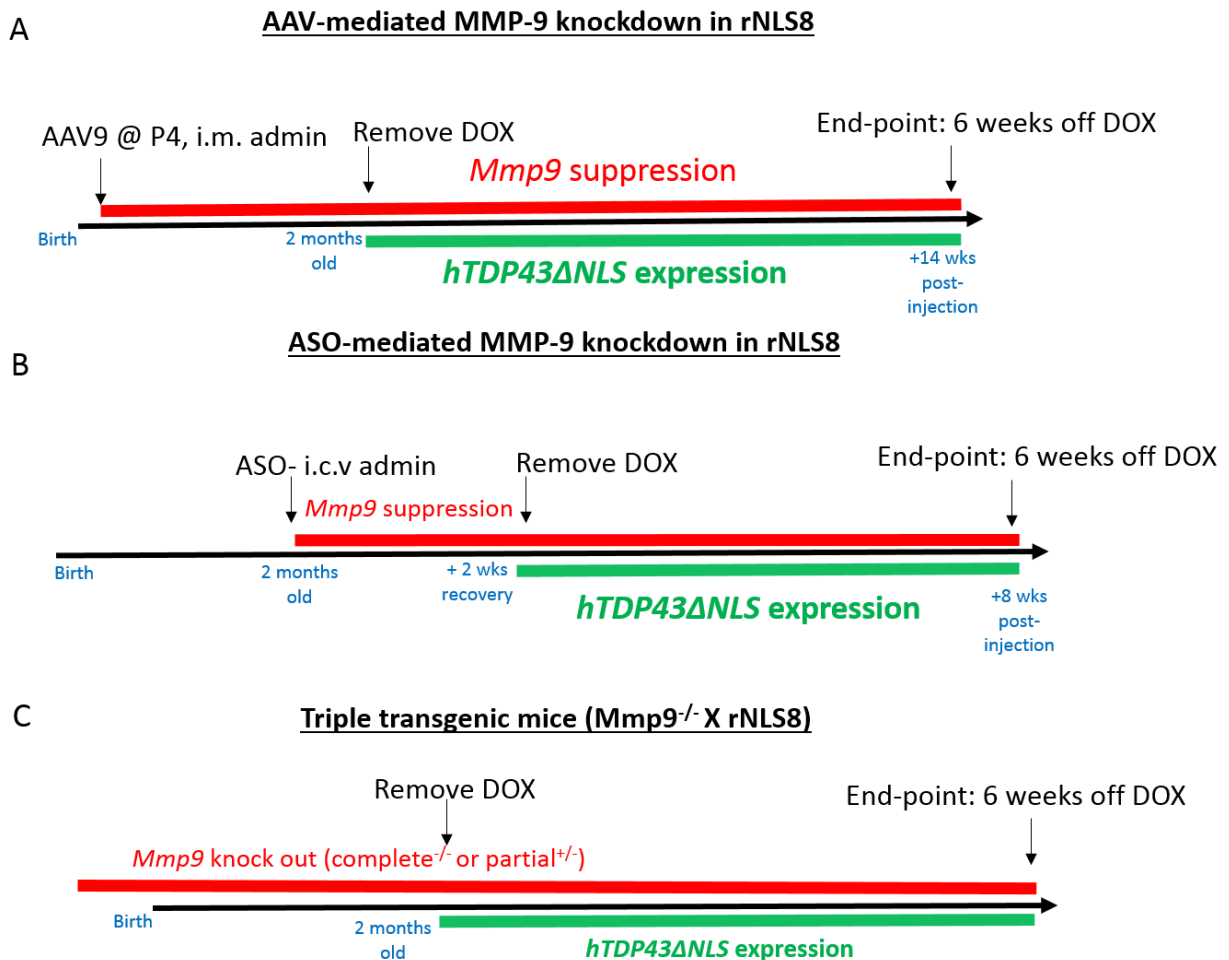

**Supplementary Fig. 1. Experimental timelines for studies targeting MMP-9 in rNLS8 mice.** **A.** shRNA against *Mmp9* was delivered to MNs that connect to the TA muscle on one side of an rNLS8 mouse pup at 4 days old, lowering MMP-9 expression in that motor pool from the first week of life on (red line). When the injected mice were 2 months old, DOX was removed from their diets to induce transgene expression (green line). Mice were euthanized 6 weeks later for tissue analysis. **B.** ASOs were delivered into adult mice to reduce MMP-9 expression throughout the central nervous system for 9-13 weeks (red line), starting around 2 months of age. 2 weeks after ASO administration, DOX was removed from the rNLS8 mice's diet to induce transgene expression (green line). Mice were euthanized 6 weeks later. **C.** *Mmp9*<sup>-/-</sup> mice were crossed with rNLS8 mice, to produce *Mmp9*<sup>-/-</sup>;rNLS8 that never had MMP-9 expressed in any tissue. These mice were maintained on DOX until they were 2 months old, and then it was removed to induce transgene expression (green line). Mice were euthanized at 6 weeks off DOX for tissue analysis.

## Supplementary Figure 2

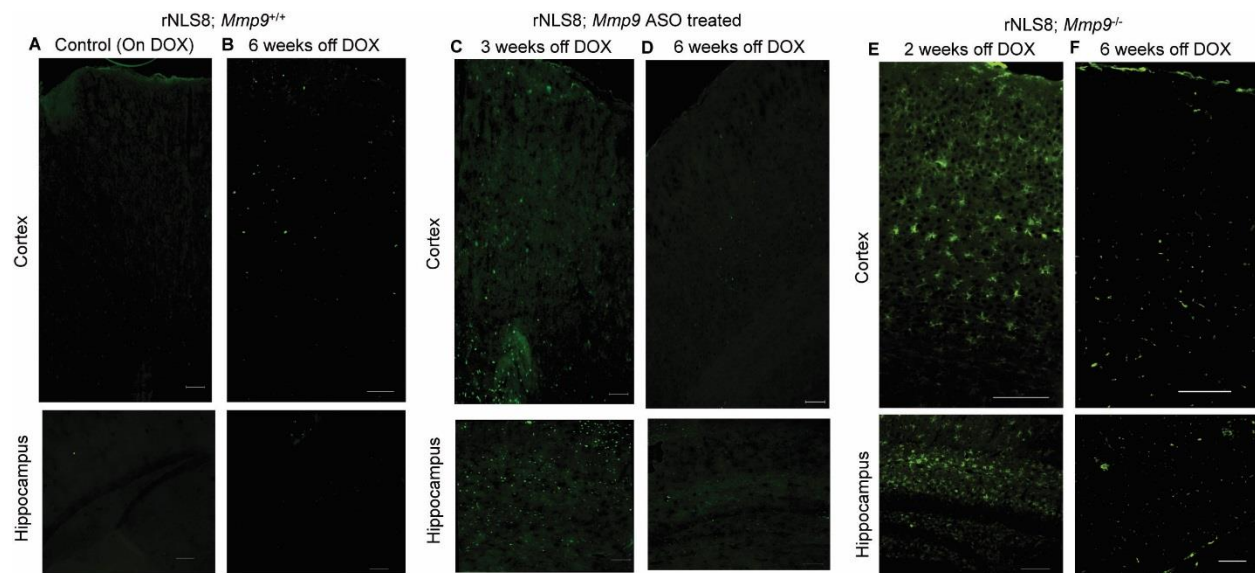

**Supplementary Fig. 2. C-fos expression in cortex and hippocampus of ASO-xMMP9 and rNLS8;*Mmp9*<sup>-/-</sup> mice suggest that lowering *Mmp9* levels in the brain triggers an increase in seizure activity after about 2 weeks of *hTDP43ΔNLS* expression.** Representative immunostaining with c-fos (green) of cryosections from cortex (top row) and hippocampus (bottom row) of rNLS8 mice show very low c-fos expression in animals with MMP-9 intact either prior to transgene expression (**A**, control on DOX) or after 6 weeks off DOX (**B**). In contrast, when MMP-9 levels are reduced either using ASOs or genetically, a subset of animals die early and have increased c-fos levels, especially in the hippocampus (**C**, **E**), though not in all animals off DOX (**D**, **F**). Scale bars= 100 μm.

### Supplementary Figure 3

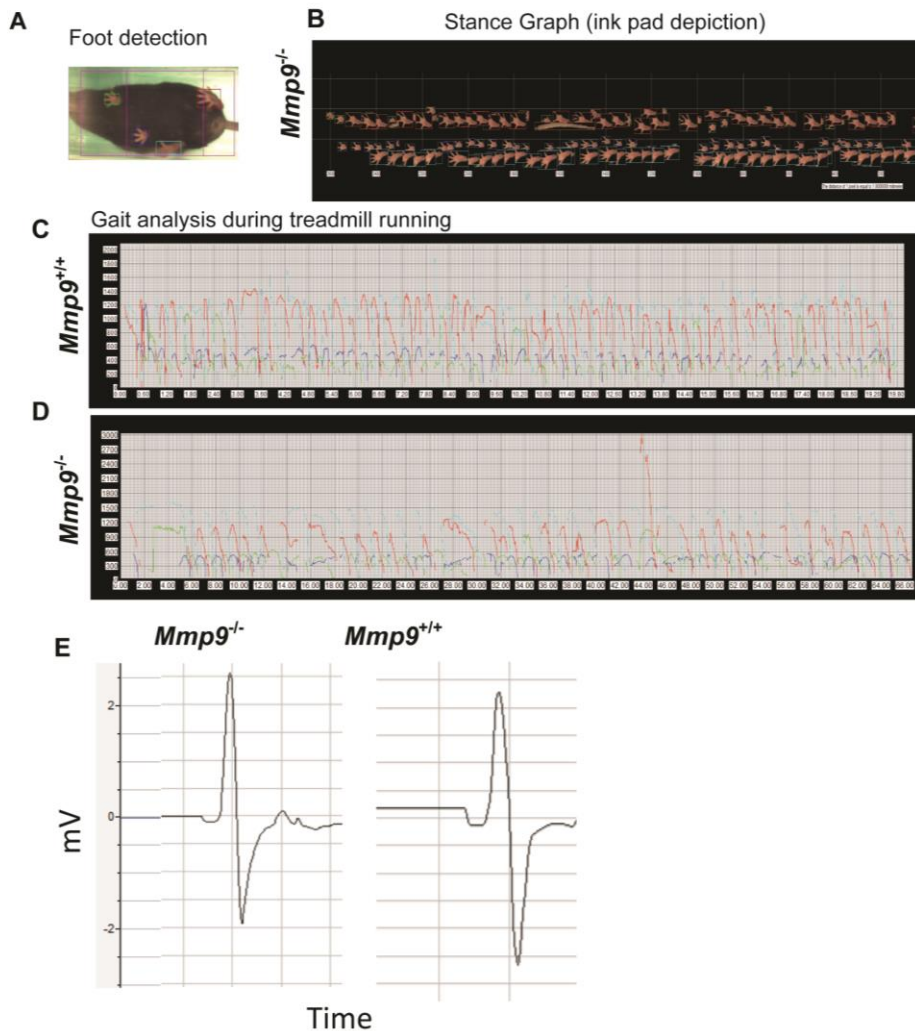

**Supplementary Fig. 3. *Mmp9*<sup>-/-</sup> mice have no apparent motor defects compared to WT controls.** (A-D) The GaitScan system was used to compare *Mmp9*<sup>+/+</sup> and *Mmp9*<sup>-/-</sup> littermates. Videos were taken of the mice running on a transparent belt treadmill and the software identified the footprints of the mice as they ran from the ventral view (A-B). The software then analyzed the videos, and determined various characteristic parameters that are related to the pathophysiological conditions, and displayed their overall performance on stance graphs (C-D). No significant differences were detected between *Mmp9*<sup>+/+</sup> and *Mmp9*<sup>-/-</sup> mice, with both groups of animals able to run at the maximum track speed (18 cm per second) with average stride frequencies > 2 Hz. (E) Correspondingly, we did not detect any significant differences in the maximum evoked CMAP from the gastrocnemius muscles of *Mmp9*<sup>-/-</sup> (left) or *Mmp9*<sup>+/+</sup> (right) mice. Representative traces are shown. This is consistent with the almost complete TA muscle innervation detected in adult *Mmp9*<sup>-/-</sup> mice (avg: 92%).
